# Supplementary material for: Non-Invasive Determination of Cardiac Output in Pre-Capillary Pulmonary Hypertension
Source: PubMed Central journal article supplement (PMC4520479; doi:10.1371/journal.pone.0134221), 2015-07-30
Supplement: pone.0134221.s001.pdf [file pone.0134221.s001.pdf]

## General data (n=50)

### PAH

| Patient n°   | Age           | Sex       | Height       | Weight      | BMI         | BSA         | SAP          | DAP         | MAP         | RAP        | mPAP        | dPAP        | sPAP        | PAWP       | PVR        | SVR         | COTD       | SD         | COMF       | SD         | Bos         | Sild        | Tada       | Epo         | Trep       | CCB        | Comb        |
|--------------|---------------|-----------|--------------|-------------|-------------|-------------|--------------|-------------|-------------|------------|-------------|-------------|-------------|------------|------------|-------------|------------|------------|------------|------------|-------------|-------------|------------|-------------|------------|------------|-------------|
| 4            | 43            |           | 162          | 90          | 34.3        | 1.94        | 115          | 50          | 74          | 8          | 55          | 32          | 83          | 10         | 7.30       | 10.70       | 6.2        | 0.6        | 7.1        | 0.4        | 1           | 1           |            | 1           |            |            | 3           |
| 9            | 72            |           | 164          | 75          | 27.9        | 1.82        | 139          | 69          | 91          | 9          | 63          | 34          | 115         | 10         | 7.40       | 11.44       | 7.2        | 0.2        | 8.4        | 0.9        | 1           |             |            |             |            |            |             |
| 10           | 54            | 1         | 165          | 85          | 31.2        | 1.92        | 122          | 61          | 83          | 9          | 43          | 20          | 71          | 12         | 4.56       | 10.88       | 6.8        | 0.1        | 6.5        | 0.4        | 1           | 1           |            | 1           |            |            | 3           |
| 14           | 57            |           | 160          | 60          | 23.4        | 1.62        | 154          | 68          | 94          | 1          | 36          | 15          | 60          | 7          | 5.61       | 18.00       | 5.2        | 0.4        | 6.4        | 0.6        | 1           | 1           |            |             |            |            | 2           |
| 28           | 29            |           | 168          | 68          | 24.1        | 1.77        | 123          | 61          | 84          | 7          | 62          | 47          | 89          | 10         | 10.00      | 14.81       | 5.2        | 0.9        | 5.3        | 0.7        | 1           |             |            | 1           |            |            | 2           |
| 31           | 78            |           | 159          | 82          | 32.4        | 1.84        | 111          | 86          | 103         | 9          | 51          | 10          | 27          | 10         | 9.11       | 20.89       | 4.5        | 0.0        | 5.0        | 0.6        | 1           | 1           |            |             |            |            | 2           |
| 33           | 38            | 1         | 164          | 63          | 23.4        | 1.69        | 124          | 75          | 93          | 5          | 35          | 20          | 58          | 8          | 5.23       | 17.05       | 5.2        | 0.2        | 6.4        | 1.0        | 1           | 1           |            |             |            |            | 2           |
| 34           | 25            |           | 152          | 67          | 29.0        | 1.64        | 131          | 70          | 101         | 2          | 49          | 36          | 75          | 11         | 6.71       | 17.47       | 5.7        | 2.3        | 6.2        | 0.3        | 1           | 1           |            | 1           |            |            | 3           |
| 45           | 62            |           | 155          | 68          | 28.3        | 1.67        | 137          | 64          | 89          | 0          | 33          | 20          | 55          | 5          | 5.38       | 17.12       | 5.2        | 0.1        | 7.2        | 0.4        | 1           |             |            |             |            |            |             |
| 46           | 57            | 1         | 170          | 54          | 18.7        | 1.62        | 108          | 63          | 79          | 5          | 45          | 29          | 70          | 8          | 10.00      | 20.00       | 3.7        | 0.1        | 6.3        | 1.2        | 1           | 1           |            |             |            |            | 2           |
| 6            | 31            | 1         | 165          | 60          | 22.0        | 1.66        | 106          | 64          | 77          | 4          | 56          | 39          | 82          | 10         | 7.36       | 11.68       | 6.3        | 0.1        | 6.9        | 0.3        | 1           | 1           |            | 1           |            |            | 3           |
| 5            | 44            | 1         | 182          | 91          | 27.5        | 2.13        | 142          | 82          | 105         | 5          | 45          | 25          | 75          | 8          | 5.14       | 13.89       | 7.2        | 0.2        | 6.5        | 0.5        |             |             |            |             | 1          |            |             |
| 38           | 55            |           | 160          | 63          | 24.6        | 1.66        | 144          | 63          | 84          | 4          | 60          | 43          | 82          | 8          | 7.09       | 10.91       | 7.3        | 0.3        | 6.3        | 0.7        |             |             | 1          |             |            |            |             |
| 36           | 46            |           | 162          | 59          | 22.5        | 1.63        | 137          | 52          | 78          | 8          | 43          | 30          | 71          | 7          | 5.87       | 11.41       | 6.1        | 0.2        | 7.3        | 1.1        |             |             |            |             |            | 1          |             |
| 27           | 47            | 1         | 175          | 53          | 17.3        | 1.64        | 82           | 64          | 69          | 12         | 48          | 30          | 86          | 7          | 9.46       | 13.15       | 4.3        | 0.3        | 3.8        | 0.2        | 1           |             |            |             |            |            |             |
| 39           | 50            |           | 160          | 43          | 16.8        | 1.41        | 130          | 80          | 98          | 4          | 39          | 26          | 70          | 7          | 5.29       | 15.54       | 6.1        | 0.2        | 6.0        | 0.9        | 1           |             |            |             |            |            |             |
| 41           | 27            | 1         | 183          | 80          | 23.9        | 2.02        | 138          | 78          | 96          | 7          | 44          | 30          | 64          | 9          | 2.98       | 7.59        | 11.7       | 0.2        | 9.9        | 0.6        |             |             | 1          |             |            |            |             |
| 23           | 35            | 1         | 178          | 66          | 20.8        | 1.82        | 121          | 75          | 93          | 10         | 80          | 55          | 116         | 11         | 9.41       | 11.32       | 7.3        | 0.2        | 7.1        | 0.4        | 1           |             |            | 1           |            |            | 2           |
| 32           | 40            | 1         | 179          | 62          | 19.4        | 1.78        | 104          | 56          | 68          | 4          | 51          | 31          | 81          | 6          | 7.31       | 10.39       | 6.2        | 1.0        | 7.2        | 0.4        | 1           |             |            | 1           |            |            | 2           |
| 47           | 43            | 1         | 183          | 96          | 28.7        | 2.18        | 168          | 88          | 126         | 3          | 33          | 20          | 57          | 12         | 1.85       | 10.85       | 11.3       | 0.9        | 14.2       | 0.6        |             |             | 1          |             |            |            |             |
| 65           | 40            |           | 165          | 59          | 21.7        | 1.65        | 143          | 70          | 112         | 3          | 47          | 31          | 59          | 10         | 8.22       | 24.22       | 4.5        | 0.1        | 6.8        | 1.1        | 1           |             |            |             |            |            |             |
| 67           | 51            | 1         | 160          | 51          | 19.9        | 1.51        | 187          | 89          | 118         | 4          | 31          | 19          | 48          | 9          | 4.78       | 24.78       | 4.6        | 0.3        | 4.8        | 0.3        |             |             |            |             |            |            |             |
| 19           | 72            |           | 166          | 107         | 38.8        | 2.13        | 171          | 69          | 98          | 8          | 30          | 16          | 41          | 13         | 1.92       | 10.17       | 8.9        | 0.1        | 9.6        | 1.0        |             |             |            |             |            |            |             |
| 12           | 39            | 1         | 184          | 81          | 23.9        | 2.04        | 132          | 74          | 98          | 9          | 48          | 29          | 66          | 15         | 5.89       | 15.89       | 5.6        | 0.1        | 6.8        | 0.5        |             |             |            |             |            |            |             |
| 24           | 65            |           | 161          | 51          | 19.7        | 1.52        | 124          | 75          | 93          | 7          | 35          | 23          | 61          | 2          | 12.89      | 33.59       | 2.6        | 0.3        | 4.1        | 0.3        |             |             |            |             |            |            |             |
| 25           | 14            |           | 160          | 70          | 27.3        | 1.73        | 69           | 61          | 66          | 6          | 100         | 78          | 144         | 22         | 26.44      | 20.34       | 3.0        | 0.4        | 3.8        | 0.3        |             |             |            |             |            |            |             |
| 30           | 53            |           | 165          | 60          | 22.0        | 1.66        | 109          | 82          | 93          | 0          | 41          | 28          | 62          | 2          | 11.25      | 26.83       | 3.5        | 0.1        | 3.3        | 0.4        |             |             |            |             |            |            |             |
| 37           | 62            |           | 169          | 75          | 26.3        | 1.86        | 144          | 78          | 96          | 4          | 40          | 30          | 76          | 9          | 5.89       | 17.47       | 5.3        | 0.2        | 6.1        | 0.3        |             |             |            |             |            |            |             |
| 42           | 58            |           | 158          | 62          | 24.8        | 1.63        | 126          | 71          | 90          | 6          | 63          | 40          | 98          | 9          | 6.00       | 9.33        | 9.0        | 0.6        | 10.1       | 0.8        |             |             |            |             |            |            |             |
| 50           | 73            |           | 161          | 76          | 29.3        | 1.80        | 115          | 58          | 77          | 11         | 52          | 33          | 86          | 8          | 9.17       | 13.75       | 4.8        | 0.1        | 5.1        | 1.6        |             |             |            |             |            |            |             |
| <b>Total</b> | <b>48.7</b>   | <b>12</b> | <b>166.5</b> | <b>69.2</b> | <b>25.0</b> | <b>1.77</b> | <b>128.5</b> | <b>69.9</b> | <b>90.9</b> | <b>5.8</b> | <b>48.6</b> | <b>30.6</b> | <b>74.3</b> | <b>9.2</b> | <b>7.5</b> | <b>14.7</b> | <b>6.0</b> | <b>0.3</b> | <b>6.7</b> | <b>0.6</b> | <b>16</b>   | <b>11</b>   | <b>1</b>   | <b>6</b>    | <b>1</b>   | <b>1</b>   | <b>11</b>   |
|              | <b>15.6</b>   |           | <b>8.9</b>   | <b>14.8</b> | <b>5.1</b>  | <b>0.19</b> | <b>24.9</b>  | <b>10.1</b> | <b>14.2</b> | <b>3.1</b> | <b>14.9</b> | <b>13.2</b> | <b>23.1</b> | <b>3.7</b> | <b>4.4</b> | <b>7.4</b>  | <b>2.1</b> | <b>0.5</b> | <b>2.2</b> | <b>0.3</b> | <b>72.7</b> | <b>50.0</b> | <b>4.5</b> | <b>27.3</b> | <b>4.5</b> | <b>4.5</b> | <b>50.0</b> |
|              | <b>% 60.0</b> |           |              |             |             |             |              |             |             |            |             |             |             |            |            |             |            |            |            |            |             |             |            |             |            |            |             |

## General data (n=50)

### CTEPH

| Patient n°   | Age           | Sexe     | Height       | Weight      | BMI         | BSA         | SAP          | DAP         | MAP          | RAP        | mPAP        | dPAP        | sPAP        | PAWP       | PVRtd      | SVR         | TDCO       | TDsd       | MFCO       | MFsd       | Bos         | Sild        | Tada        | Epo        | Trep       | CCB        | Comb        |   |
|--------------|---------------|----------|--------------|-------------|-------------|-------------|--------------|-------------|--------------|------------|-------------|-------------|-------------|------------|------------|-------------|------------|------------|------------|------------|-------------|-------------|-------------|------------|------------|------------|-------------|---|
| 3            | 56            | 1        | 174          | 73          | 24.1        | 1.87        | 139          | 77          | 95           | 11         | 45          | 26          | 80          | 5          | 8.76       | 18.39       | 4.6        | 0.3        | 4.1        | 0.3        | 1           |             |             |            |            |            |             |   |
| 15           | 79            |          | 155          | 58          | 24.1        | 1.56        | 180          | 80          | 120          | 6          | 52          | 28          | 91          | 7          | 16.27      | 41.20       | 2.8        | 0.2        | 2.9        | 0.8        |             |             |             |            |            |            |             |   |
| 18           | 65            |          | 172          | 80          | 27.0        | 1.93        | 171          | 93          | 133          | 4          | 33          | 20          | 53          | 6          | 5.91       | 28.25       | 4.6        | 0.2        | 4.8        | 0.5        |             |             |             |            |            |            |             |   |
| 20           | 66            |          | 152          | 84          | 36.4        | 1.80        | 128          | 66          | 85           | 14         | 54          | 30          | 95          | 7          | 12.70      | 19.19       | 3.7        | 0.2        | 5.4        | 0.6        |             |             |             |            |            |            |             |   |
| 21           | 64            | 1        | 171          | 70          | 23.9        | 1.82        | 146          | 77          | 99           | 5          | 60          | 35          | 111         | 8          | 10.99      | 19.86       | 4.7        | 0.2        | 4.8        | 0.1        |             |             |             |            |            |            |             |   |
| 22           | 63            |          | 163          | 55          | 20.7        | 1.58        | 154          | 87          | 123          | 5          | 60          | 34          | 104         | 7          | 18.28      | 40.69       | 2.9        | 0.1        | 4.1        | 0.3        |             |             |             |            |            |            |             |   |
| 29           | 36            | 1        | 190          | 83          | 23.0        | 2.11        | 128          | 74          | 90           | 3          | 30          | 19          | 47          | 6          | 3.19       | 11.55       | 7.5        | 0.5        | 7.1        | 0.3        |             |             |             |            |            |            |             |   |
| 43           | 69            |          | 160          | 62          | 24.2        | 1.64        | 157          | 75          | 109          | 18         | 50          | 28          | 88          | 6          | 12.22      | 25.28       | 3.6        | 0.2        | 5.6        | 0.3        |             |             |             |            |            |            |             |   |
| 44           | 68            |          | 164          | 70          | 26.0        | 1.76        | 179          | 84          | 122          | 6          | 42          | 25          | 75          | 10         | 10.91      | 39.55       | 2.9        | 0.3        | 5          | 1.3        |             |             |             |            |            |            |             |   |
| 49           | 66            | 1        | 178          | 106         | 33.5        | 2.23        | 138          | 78          | 101          | 14         | 48          | 25          | 79          | 8          | 6.35       | 13.81       | 6.3        | 0.1        | 6.7        | 0.2        |             |             |             |            |            |            |             |   |
| 53           | 53            |          | 155          | 50          | 20.8        | 1.47        | 154          | 106         | 134          | 0          | 11          | 1           | 21          | 1          | 2.29       | 30.69       | 4.4        | 0.3        | 4.8        | 0.5        |             |             |             |            |            |            |             |   |
| 64           | 70            | 1        | 169          | 72          | 25.2        | 1.82        | 148          | 88          | 105          | 2          | 40          | 23          | 68          | 2          | 9.34       | 25.33       | 4.1        | 0.2        | 4.6        | 0.4        |             |             |             |            |            |            |             |   |
| 26           | 64            |          | 152          | 66          | 28.6        | 1.63        | 95           | 59          | 74           | 5          | 39          | 19          | 69          | 8          | 6.89       | 15.33       | 4.5        | 0.2        | 5.6        | 0.5        | 1           | 1           |             |            |            |            | 2           |   |
| 52           | 81            | 1        | 162          | 46          | 17.5        | 1.46        | 96           | 53          | 70           | 10         | 38          | 18          | 74          | 6          | 9.14       | 17.14       | 3.5        | 0.1        | 3.1        | 0.8        | 1           | 1           |             |            |            |            | 2           |   |
| <b>Total</b> | <b>64.3</b>   | <b>6</b> | <b>165.5</b> | <b>69.6</b> | <b>25.4</b> | <b>1.76</b> | <b>143.8</b> | <b>78.4</b> | <b>104.3</b> | <b>7.4</b> | <b>43.0</b> | <b>23.6</b> | <b>75.4</b> | <b>6.2</b> | <b>9.5</b> | <b>24.7</b> | <b>4.3</b> | <b>0.2</b> | <b>4.9</b> | <b>0.5</b> | <b>3</b>    | <b>2</b>    | <b>0</b>    | <b>0</b>   | <b>0</b>   | <b>0</b>   | <b>2</b>    |   |
|              | <b>11.0</b>   |          | <b>10.9</b>  | <b>15.7</b> | <b>4.9</b>  | <b>0.23</b> | <b>26.2</b>  | <b>13.5</b> | <b>20.4</b>  | <b>5.2</b> | <b>13.0</b> | <b>8.4</b>  | <b>23.7</b> | <b>2.4</b> | <b>4.5</b> | <b>10.1</b> | <b>1.3</b> | <b>0.1</b> | <b>1.2</b> | <b>0.3</b> | <b>21.4</b> | <b>14.3</b> | <b>0.0</b>  | <b>0.0</b> | <b>0.0</b> | <b>0.0</b> | <b>14.3</b> |   |
|              | <b>% 57.1</b> |          |              |             |             |             |              |             |              |            |             |             |             |            |            |             |            |            |            |            |             |             |             |            |            |            |             |   |
| 61           | 34            |          | 160          | 64          | 25.0        | 1.67        | 123          | 79          | 96           | 1          | 31          | 17          | 45          | 7          | 5.22       | 20.65       | 4.6        | 0.1        | 5.1        | 0.3        | 1           | 1           |             |            |            |            |             | 2 |
| 62           | 73            | 1        | 176          | 98          | 31.6        | 2.14        | 112          | 66          | 84           | 12         | 36          | 24          | 52          | 15         | 3.21       | 11.02       | 6.5        | 0.2        | 5.9        | 0.8        | 1           |             | 1           |            |            |            | 2           |   |
| 8            | 77            | 1        | 163          | 78          | 29.4        | 1.84        | 194          | 94          | 127          | 2          | 27          | 10          | 47          | 8          | 3.80       | 25.00       | 5.0        | 0.6        | 4.8        | 1.1        |             |             |             |            |            |            |             |   |
| 16           | 35            |          | 169          | 97          | 34.0        | 2.07        | 116          | 63          | 76           | 4          | 15          | 8           | 23          | 6          | 1.54       | 12.34       | 5.8        | 0.2        | 7.8        | 0.8        |             |             |             |            |            |            |             |   |
| 35           | 71            |          | 150          | 93          | 41.3        | 1.86        | 156          | 72          | 92           | 4          | 20          | 10          | 31          | 9          | 2.08       | 16.60       | 5.3        | 0.3        | 5.6        | 1.7        |             |             |             |            |            |            |             |   |
| 57           | 47            |          | 162          | 72          | 27.4        | 1.77        | 141          | 74          | 94           | 3          | 29          | 17          | 43          | 11         | 3.12       | 15.78       | 5.8        | 0.2        | 8.0        | 0.7        |             |             |             |            |            |            |             |   |
| <b>Total</b> | <b>56.2</b>   | <b>2</b> | <b>163.3</b> | <b>83.7</b> | <b>31.5</b> | <b>1.89</b> | <b>140.2</b> | <b>74.8</b> | <b>95.0</b>  | <b>4.3</b> | <b>26.3</b> | <b>14.3</b> | <b>40.2</b> | <b>9.3</b> | <b>3.2</b> | <b>17.1</b> | <b>5.5</b> | <b>0.2</b> | <b>6.2</b> | <b>0.9</b> | <b>2</b>    | <b>1</b>    | <b>1</b>    | <b>0</b>   | <b>0</b>   | <b>0</b>   | <b>2</b>    |   |
|              | <b>19.8</b>   |          | <b>8.8</b>   | <b>14.3</b> | <b>5.8</b>  | <b>0.18</b> | <b>34.7</b>  | <b>12.4</b> | <b>19.5</b>  | <b>3.9</b> | <b>7.6</b>  | <b>6.1</b>  | <b>10.9</b> | <b>3.3</b> | <b>1.3</b> | <b>5.8</b>  | <b>0.7</b> | <b>0.2</b> | <b>1.4</b> | <b>0.5</b> | <b>33.3</b> | <b>16.7</b> | <b>16.7</b> | <b>0.0</b> | <b>0.0</b> | <b>0.0</b> | <b>33.3</b> |   |
|              | <b>% 66.7</b> |          |              |             |             |             |              |             |              |            |             |             |             |            |            |             |            |            |            |            |             |             |             |            |            |            |             |   |
