# Supplementary material for: Non-Invasive Determination of Cardiac Output in Pre-Capillary Pulmonary Hypertension
Source: PubMed Central journal article supplement (PMC4520479; doi:10.1371/journal.pone.0134221), 2015-07-30
Supplement: pone.0134221.s002.pdf [file pone.0134221.s002.pdf]

Data CO<sub>MF</sub> - CO<sub>TD</sub> (n=98)

| Patient n° | PAH | CTEPH | State | COTD | SD  | COMF | SD  | CO mean | CO diff |
|------------|-----|-------|-------|------|-----|------|-----|---------|---------|
| 8          |     | 1     | B     | 5.0  | 0.6 | 4.8  | 1.1 | 4.9     | -0.2    |
| 16         |     | 1     | B     | 5.8  | 0.2 | 7.8  | 0.8 | 6.8     | 2.0     |
| 35         |     | 1     | B     | 5.3  | 0.3 | 5.6  | 1.7 | 5.5     | 0.3     |
| 57         |     | 1     | B     | 5.8  | 0.2 | 8.0  | 0.7 | 6.9     | 2.2     |
| 61         |     | 1     | B     | 4.6  | 0.1 | 5.1  | 0.3 | 4.9     | 0.5     |
| 62         |     | 1     | B     | 6.5  | 0.2 | 5.9  | 0.8 | 6.2     | -0.6    |
| 3          |     | 1     | B     | 4.6  | 0.3 | 4.1  | 0.3 | 4.3     | -0.5    |
| 15         |     | 1     | B     | 2.8  | 0.2 | 5.6  | 0.8 | 4.2     | 2.8     |
| 18         |     | 1     | B     | 4.6  | 0.2 | 4.8  | 0.5 | 4.7     | 0.2     |
| 20         |     | 1     | B     | 3.7  | 0.2 | 5.4  | 0.6 | 4.6     | 1.7     |
| 21         |     | 1     | B     | 4.7  | 0.2 | 4.8  | 0.1 | 4.8     | 0.1     |
| 22         |     | 1     | B     | 2.9  | 0.1 | 4.1  | 0.3 | 3.5     | 1.2     |
| 26         |     | 1     | B     | 4.5  | 0.2 | 5.6  | 0.5 | 5.1     | 1.1     |
| 29         |     | 1     | B     | 7.5  | 0.5 | 7.1  | 0.3 | 7.3     | -0.4    |
| 43         |     | 1     | B     | 3.6  | 0.2 | 5.6  | 0.3 | 4.6     | 2.0     |
| 44         |     | 1     | B     | 2.9  | 0.3 | 5    | 1.3 | 4.0     | 2.1     |
| 49         |     | 1     | B     | 6.3  | 0.1 | 6.7  | 0.2 | 6.5     | 0.4     |
| 52         |     | 1     | B     | 3.5  | 0.1 | 3.1  | 0.8 | 3.3     | -0.4    |
| 53         |     | 1     | B     | 4.4  | 0.3 | 4.8  | 0.5 | 4.6     | 0.4     |
| 64         |     | 1     | B     | 4.1  | 0.2 | 4.6  | 0.4 | 4.3     | 0.5     |
| 16         |     | 1     | E     | 7.1  | 0.4 | 8.2  | 1.1 | 7.7     | 1.1     |
| 16         |     | 1     | E     | 7.4  | 0.1 | 10.3 | 1.0 | 8.9     | 2.9     |
| 16         |     | 1     | E     | 8.4  | 0.4 | 12.8 | 1.2 | 10.6    | 4.4     |
| 16         |     | 1     | E     | 10.9 | 0.4 | 15.3 | 1.2 | 13.1    | 4.4     |
| 53         |     | 1     | E     | 5.1  | 0.2 | 4.6  | 0.2 | 4.9     | -0.5    |
| 53         |     | 1     | E     | 6.3  | 0.4 | 6.0  | 0.4 | 6.2     | -0.3    |
| 53         |     | 1     | E     | 7.3  | 0.1 | 7.1  | 0.5 | 7.2     | -0.2    |
| 29         |     | 1     | F     | 7.2  | 0.2 | 7.2  | 0.5 | 7.2     | 0.0     |
| 3          |     | 1     | NO    | 4.3  | 0.1 | 4.3  | 0.3 | 4.3     | 0.0     |
| 15         |     | 1     | NO    | 3.2  | 0.2 | 5.8  | 0.7 | 4.5     | 2.6     |
| 18         |     | 1     | NO    | 5.0  | 0.0 | 5.7  | 0.1 | 5.4     | 0.7     |
| 20         |     | 1     | NO    | 3.5  | 0.2 | 5.8  | 0.8 | 4.7     | 2.3     |
| 21         |     | 1     | NO    | 4.2  | 0.1 | 5.3  | 0.3 | 4.8     | 1.1     |
| 43         |     | 1     | NO    | 3.4  | 0.1 | 5.3  | 0.1 | 4.4     | 1.9     |
| 44         |     | 1     | NO    | 2.9  | 0.2 | 5.4  | 1.4 | 4.2     | 2.5     |
| 49         |     | 1     | NO    | 6.2  | 0.4 | 7.2  | 0.3 | 6.7     | 1.0     |
| 64         |     | 1     | NO    | 4.2  | 0.2 | 4.9  | 0.6 | 4.6     | 0.7     |
| 16         |     | 1     | P     | 5.2  | 0.1 | 7.1  | 0.7 | 6.2     | 1.9     |
| 57         |     | 1     | P     | 6.4  | 0.1 | 8.3  | 0.4 | 7.4     | 1.9     |
| 61         |     | 1     | P     | 4.7  | 0.1 | 5.5  | 0.2 | 5.1     | 0.8     |
| 49         |     | 1     | P     | 6.5  | 0.5 | 7.1  | 0.6 | 6.8     | 0.6     |
| 53         |     | 1     | P     | 4.6  | 0.2 | 4.7  | 0.4 | 4.7     | 0.1     |
| 64         |     | 1     | P     | 4.5  | 0.5 | 5.1  | 1.6 | 4.8     | 0.6     |
| 4          | 1   |       | B     | 6.2  | 0.6 | 7.1  | 0.4 | 6.6     | 0.9     |
| 5          | 1   |       | B     | 7.2  | 0.2 | 6.5  | 0.5 | 6.9     | -0.7    |
| 6          | 1   |       | B     | 6.3  | 0.1 | 6.9  | 0.3 | 6.6     | 0.7     |
| 9          | 1   |       | B     | 7.2  | 0.2 | 8.4  | 0.9 | 7.8     | 1.2     |
| 10         | 1   |       | B     | 6.8  | 0.1 | 6.5  | 0.4 | 6.7     | -0.3    |
| 12         | 1   |       | B     | 5.6  | 0.1 | 6.8  | 0.5 | 6.2     | 1.2     |
| 14         | 1   |       | B     | 5.2  | 0.4 | 6.4  | 0.6 | 5.8     | 1.2     |
| 19         | 1   |       | B     | 8.9  | 0.1 | 9.6  | 1.0 | 9.2     | 0.7     |
| 23         | 1   |       | B     | 7.3  | 0.2 | 7.1  | 0.4 | 7.2     | -0.2    |
| 24         | 1   |       | B     | 2.6  | 0.3 | 4.1  | 0.3 | 3.3     | 1.5     |
| 25         | 1   |       | B     | 3.0  | 0.4 | 3.8  | 0.3 | 3.4     | 0.9     |
| 27         | 1   |       | B     | 4.3  | 0.3 | 3.8  | 0.2 | 4.1     | -0.5    |
| 28         | 1   |       | B     | 5.2  | 0.9 | 5.3  | 0.7 | 5.3     | 0.1     |
| 30         | 1   |       | B     | 3.5  | 0.1 | 3.3  | 0.4 | 3.4     | -0.2    |
| 31         | 1   |       | B     | 4.5  | 0.0 | 5.0  | 0.6 | 4.8     | 0.5     |
| 32         | 1   |       | B     | 6.2  | 1.0 | 7.2  | 0.4 | 6.7     | 1.0     |
| 33         | 1   |       | B     | 5.2  | 0.2 | 6.4  | 1.0 | 5.8     | 1.2     |
| 34         | 1   |       | B     | 5.7  | 2.3 | 6.2  | 0.3 | 5.9     | 0.5     |
| 36         | 1   |       | B     | 6.1  | 0.2 | 7.3  | 1.1 | 6.7     | 1.2     |

Data CO<sub>MF</sub> - CO<sub>TD</sub> (n=98)

|    |   |    |      |     |      |     |      |      |
|----|---|----|------|-----|------|-----|------|------|
| 37 | 1 | B  | 5.3  | 0.2 | 6.1  | 0.3 | 5.7  | 0.8  |
| 38 | 1 | B  | 7.3  | 0.3 | 6.3  | 0.7 | 6.8  | -1.0 |
| 39 | 1 | B  | 6.1  | 0.2 | 6.0  | 0.9 | 6.0  | -0.1 |
| 41 | 1 | B  | 11.7 | 0.2 | 9.9  | 0.6 | 10.8 | -1.8 |
| 42 | 1 | B  | 9.0  | 0.6 | 10.1 | 0.8 | 9.6  | 1.1  |
| 45 | 1 | B  | 5.2  | 0.1 | 7.2  | 0.4 | 6.2  | 2.0  |
| 46 | 1 | B  | 3.7  | 0.1 | 6.3  | 1.2 | 5.0  | 2.6  |
| 47 | 1 | B  | 11.3 | 0.9 | 14.2 | 0.6 | 12.8 | 2.9  |
| 50 | 1 | B  | 4.8  | 0.1 | 5.1  | 1.6 | 5.0  | 0.3  |
| 65 | 1 | B  | 4.5  | 0.1 | 6.8  | 1.1 | 5.7  | 2.3  |
| 67 | 1 | B  | 4.6  | 0.3 | 4.8  | 0.3 | 4.7  | 0.2  |
| 36 | 1 | E  | 7.9  | 0.5 | 9.9  | 0.7 | 8.9  | 2.0  |
| 36 | 1 | E  | 8.9  | 0.4 | 10.1 | 0.6 | 9.5  | 1.2  |
| 36 | 1 | E  | 9.6  | 0.0 | 11.2 | 0.7 | 10.4 | 1.6  |
| 36 | 1 | E  | 9.9  | 0.2 | 11.9 | 0.6 | 10.9 | 2.0  |
| 46 | 1 | E  | 5.1  | 0.1 | 7.4  | 0.7 | 6.3  | 2.3  |
| 47 | 1 | E  | 10.9 | 0.4 | 14.5 | 0.7 | 12.7 | 3.6  |
| 47 | 1 | E  | 12.7 | 0.2 | 15.2 | 0.6 | 14.0 | 2.5  |
| 50 | 1 | E  | 5.4  | 0.0 | 5.5  | 1.8 | 5.5  | 0.1  |
| 50 | 1 | E  | 5.7  | 0.4 | 6.2  | 2.1 | 6.0  | 0.5  |
| 19 | 1 | F  | 10.0 | 0.7 | 10.0 | 0.6 | 10.0 | 0.0  |
| 24 | 1 | F  | 2.7  | 0.1 | 3.6  | 0.2 | 3.2  | 0.9  |
| 30 | 1 | F  | 3.5  | 0.3 | 3.7  | 0.4 | 3.6  | 0.2  |
| 31 | 1 | F  | 4.7  | 0.1 | 5.9  | 0.6 | 5.3  | 1.2  |
| 12 | 1 | NO | 6.8  | 0.1 | 7.3  | 0.8 | 7.1  | 0.5  |
| 19 | 1 | NO | 9.4  | 0.4 | 10.2 | 0.6 | 9.8  | 0.8  |
| 24 | 1 | NO | 2.6  | 0.1 | 3.6  | 0.2 | 3.1  | 1.0  |
| 31 | 1 | NO | 5.0  | 0.1 | 6.1  | 0.4 | 5.6  | 1.1  |
| 36 | 1 | NO | 6.6  | 0.1 | 8.0  | 0.3 | 7.3  | 1.4  |
| 37 | 1 | NO | 6.0  | 0.1 | 7.7  | 0.4 | 6.9  | 1.7  |
| 50 | 1 | NO | 4.5  | 0.2 | 5.6  | 2.0 | 5.1  | 1.1  |
| 46 | 1 | P  | 3.9  | 0.4 | 8.3  | 1.8 | 6.1  | 4.4  |
| 47 | 1 | P  | 10.0 | 0.1 | 13.4 | 0.5 | 11.7 | 3.4  |
| 50 | 1 | P  | 5.1  | 0.0 | 5.3  | 2.0 | 5.2  | 0.2  |
| 65 | 1 | P  | 4.7  | 0.1 | 7.4  | 0.8 | 6.1  | 2.7  |
| 67 | 1 | P  | 5.6  | 0.3 | 5.6  | 0.4 | 5.6  | 0.0  |
