# Supplementary material for: Non-Invasive Determination of Cardiac Output in Pre-Capillary Pulmonary Hypertension
Source: PubMed Central journal article supplement (PMC4520479; doi:10.1371/journal.pone.0134221), 2015-07-30
Supplement: pone.0134221.s003.pdf [file pone.0134221.s003.pdf]

## York analysis

Figure 3A

| CO | minus  | max    | mean   |
|----|--------|--------|--------|
| 0  | -0.060 | 1.092  | 0.516  |
| 1  | 0.938  | 2.258  | 1.598  |
| 2  | 1.936  | 3.424  | 2.680  |
| 3  | 2.934  | 4.590  | 3.762  |
| 4  | 3.932  | 5.756  | 4.844  |
| 5  | 4.930  | 6.922  | 5.926  |
| 6  | 5.928  | 8.088  | 7.008  |
| 7  | 6.926  | 9.254  | 8.090  |
| 8  | 7.924  | 10.420 | 9.172  |
| 9  | 8.922  | 11.586 | 10.254 |
| 10 | 9.920  | 12.752 | 11.336 |
| 11 | 10.918 | 13.918 | 12.418 |
| 12 | 11.916 | 15.084 | 13.500 |
| 13 | 12.914 | 16.250 | 14.582 |
| 14 | 13.912 | 17.416 | 15.664 |
| 15 | 14.910 | 18.582 | 16.746 |
| 16 | 15.908 | 19.748 | 17.828 |

Figure 3B

| CO | minus  | max    | mean   |
|----|--------|--------|--------|
| 0  | -0.452 | 0.866  | 0.207  |
| 1  | 0.593  | 2.155  | 1.374  |
| 2  | 1.638  | 3.444  | 2.541  |
| 3  | 2.683  | 4.733  | 3.708  |
| 4  | 3.728  | 6.022  | 4.875  |
| 5  | 4.773  | 7.311  | 6.042  |
| 6  | 5.818  | 8.600  | 7.209  |
| 7  | 6.863  | 9.889  | 8.376  |
| 8  | 7.908  | 11.178 | 9.543  |
| 9  | 8.953  | 12.467 | 10.710 |
| 10 | 9.998  | 13.756 | 11.877 |
| 11 | 11.043 | 15.045 | 13.044 |
| 12 | 12.088 | 16.334 | 14.211 |
| 13 | 13.133 | 17.623 | 15.378 |
| 14 | 14.178 | 18.912 | 16.545 |
| 15 | 15.223 | 20.201 | 17.712 |
| 16 | 16.268 | 21.490 | 18.879 |

Figure 3C

| CO | minus  | max    | mean   |
|----|--------|--------|--------|
| 0  | 0.083  | 0.902  | 0.493  |
| 1  | 1.111  | 2.064  | 1.588  |
| 2  | 2.139  | 3.226  | 2.683  |
| 3  | 3.167  | 4.388  | 3.778  |
| 4  | 4.195  | 5.550  | 4.873  |
| 5  | 5.223  | 6.712  | 5.968  |
| 6  | 6.251  | 7.874  | 7.063  |
| 7  | 7.279  | 9.036  | 8.158  |
| 8  | 8.307  | 10.198 | 9.253  |
| 9  | 9.335  | 11.360 | 10.348 |
| 10 | 10.363 | 12.522 | 11.443 |
| 11 | 11.391 | 13.684 | 12.538 |
| 12 | 12.419 | 14.846 | 13.633 |
| 13 | 13.447 | 16.008 | 14.728 |
| 14 | 14.475 | 17.170 | 15.823 |
| 15 | 15.503 | 18.332 | 16.918 |
| 16 | 16.531 | 19.494 | 18.013 |

Figur 4A

| CO | minus  | max    | mean   |
|----|--------|--------|--------|
| 0  | -0.404 | 0.591  | 0.094  |
| 1  | 0.512  | 1.655  | 1.084  |
| 2  | 1.428  | 2.719  | 2.074  |
| 3  | 2.344  | 3.783  | 3.064  |
| 4  | 3.260  | 4.847  | 4.054  |
| 5  | 4.176  | 5.911  | 5.044  |
| 6  | 5.092  | 6.975  | 6.034  |
| 7  | 6.008  | 8.039  | 7.024  |
| 8  | 6.924  | 9.103  | 8.014  |
| 9  | 7.840  | 10.167 | 9.004  |
| 10 | 8.756  | 11.231 | 9.994  |
| 11 | 9.672  | 12.295 | 10.984 |
| 12 | 10.588 | 13.359 | 11.974 |
| 13 | 11.504 | 14.423 | 12.964 |
| 14 | 12.420 | 15.487 | 13.954 |
| 15 | 13.336 | 16.551 | 14.944 |
| 16 | 14.252 | 17.615 | 15.934 |

Figure 5A

| CO | minus  | max    | mean   |
|----|--------|--------|--------|
| 0  | -2.583 | 0.397  | -1.093 |
| 1  | -1.644 | 1.692  | 0.024  |
| 2  | -0.705 | 2.987  | 1.141  |
| 3  | 0.234  | 4.282  | 2.258  |
| 4  | 1.173  | 5.577  | 3.375  |
| 5  | 2.112  | 6.872  | 4.492  |
| 6  | 3.051  | 8.167  | 5.609  |
| 7  | 3.990  | 9.462  | 6.726  |
| 8  | 4.929  | 10.757 | 7.843  |
| 9  | 5.868  | 12.052 | 8.960  |
| 10 | 6.807  | 13.347 | 10.077 |
| 11 | 7.746  | 14.642 | 11.194 |
| 12 | 8.685  | 15.937 | 12.311 |
| 13 | 9.624  | 17.232 | 13.428 |
| 14 | 10.563 | 18.527 | 14.545 |
| 15 | 11.502 | 19.822 | 15.662 |
| 16 | 12.441 | 21.117 | 16.779 |

|           | intercept (a)    | slope (b)       |
|-----------|------------------|-----------------|
| Figure 3A | a=0.207+/-0.336  | b=1.167+/-0.062 |
| Figure 3B | a=0.516+/-0.294  | b=1.082+/-0.043 |
| Figure 3C | a=0.493+/-0.209  | b=1.095+/-0.034 |
| Figure 4A | a=0.094+/-0.254  | b=0.990+/-0.038 |
| Figure 5A | a=-1.093+/-0.760 | b=1.117+/-0.091 |
