# Supplementary material for: Non-Invasive Determination of Cardiac Output in Pre-Capillary Pulmonary Hypertension
Source: PubMed Central journal article supplement (PMC4520479; doi:10.1371/journal.pone.0134221), 2015-07-30
Supplement: pone.0134221.s004.pdf [file pone.0134221.s004.pdf]

Data CO<sub>MFcorr.</sub> - CO<sub>TD</sub> (n=48)

| Patient n° | State | COMFcorr. | SD  | COTD | SD  | Mean | Diff. |
|------------|-------|-----------|-----|------|-----|------|-------|
| 3          | NO    | 4.8       | 0.3 | 4.3  | 0.1 | 4.5  | 0.5   |
| 12         | NO    | 6.0       | 0.7 | 6.8  | 0.1 | 6.4  | -0.8  |
| 15         | NO    | 2.9       | 0.3 | 3.2  | 0.2 | 3.1  | -0.3  |
| 16         | E     | 6.1       | 0.8 | 7.1  | 0.4 | 6.6  | -1.0  |
| 16         | E     | 7.7       | 0.7 | 7.4  | 0.1 | 7.6  | 0.3   |
| 16         | E     | 9.6       | 0.9 | 8.4  | 0.4 | 9.0  | 1.2   |
| 16         | E     | 11.4      | 0.9 | 10.9 | 0.4 | 11.2 | 0.5   |
| 16         | P     | 5.3       | 0.5 | 5.2  | 0.1 | 5.3  | 0.1   |
| 18         | NO    | 5.4       | 0.1 | 5.0  | 0.0 | 5.2  | 0.4   |
| 19         | F     | 9.2       | 0.6 | 10.0 | 0.7 | 9.6  | -0.8  |
| 19         | NO    | 9.4       | 0.6 | 9.4  | 0.4 | 9.4  | 0.0   |
| 20         | NO    | 4.0       | 0.5 | 3.5  | 0.2 | 3.7  | 0.5   |
| 21         | NO    | 5.2       | 0.3 | 4.2  | 0.1 | 4.7  | 1.0   |
| 24         | F     | 2.2       | 0.1 | 2.7  | 0.1 | 2.5  | -0.5  |
| 24         | NO    | 2.2       | 0.1 | 2.6  | 0.1 | 2.4  | -0.4  |
| 29         | F     | 7.6       | 0.5 | 7.2  | 0.2 | 7.4  | 0.4   |
| 30         | F     | 3.9       | 0.4 | 3.5  | 0.1 | 3.7  | 0.4   |
| 31         | F     | 5.3       | 0.5 | 4.7  | 0.1 | 5.0  | 0.6   |
| 31         | NO    | 5.5       | 0.4 | 5.0  | 0.1 | 5.2  | 0.5   |
| 36         | E     | 8.3       | 0.6 | 7.9  | 0.5 | 8.1  | 0.4   |
| 36         | E     | 8.5       | 0.5 | 8.9  | 0.4 | 8.7  | -0.4  |
| 36         | E     | 9.4       | 0.6 | 9.6  | 0.0 | 9.5  | -0.2  |
| 36         | E     | 10.0      | 0.5 | 9.9  | 0.2 | 9.9  | 0.1   |
| 36         | NO    | 6.7       | 0.3 | 6.6  | 0.1 | 6.7  | 0.1   |
| 37         | NO    | 6.6       | 0.3 | 6.0  | 0.1 | 6.3  | 0.6   |
| 43         | NO    | 3.4       | 0.1 | 3.4  | 0.1 | 3.4  | 0.0   |
| 44         | NO    | 3.2       | 0.8 | 2.9  | 0.2 | 3.0  | 0.3   |
| 46         | E     | 4.3       | 0.4 | 5.1  | 0.1 | 4.7  | -0.8  |
| 46         | P     | 4.9       | 1.1 | 3.9  | 0.4 | 4.4  | 1.0   |
| 47         | E     | 11.6      | 0.6 | 10.9 | 0.4 | 11.2 | 0.7   |
| 47         | E     | 12.1      | 0.5 | 12.7 | 0.2 | 12.4 | -0.6  |
| 47         | P     | 10.7      | 0.4 | 10.0 | 0.1 | 10.3 | 0.7   |
| 49         | NO    | 6.8       | 0.3 | 6.2  | 0.4 | 6.5  | 0.6   |
| 49         | P     | 6.7       | 0.6 | 6.5  | 0.5 | 6.6  | 0.2   |
| 50         | E     | 5.2       | 1.7 | 5.4  | 0.0 | 5.3  | -0.2  |
| 50         | E     | 5.8       | 2.0 | 5.7  | 0.4 | 5.8  | 0.1   |
| 50         | NO    | 5.3       | 1.9 | 4.5  | 0.2 | 4.9  | 0.8   |
| 50         | P     | 5.0       | 1.9 | 5.1  | 0.0 | 5.0  | -0.1  |
| 53         | E     | 4.2       | 0.2 | 5.1  | 0.2 | 4.6  | -0.9  |
| 53         | E     | 5.5       | 0.4 | 6.3  | 0.4 | 5.9  | -0.8  |
| 53         | E     | 6.5       | 0.5 | 7.3  | 0.1 | 6.9  | -0.8  |
| 53         | P     | 4.3       | 0.4 | 4.6  | 0.2 | 4.4  | -0.3  |
| 57         | P     | 4.8       | 0.3 | 6.4  | 0.1 | 5.6  | -1.6  |
| 61         | P     | 4.8       | 0.2 | 4.7  | 0.1 | 4.8  | 0.1   |
| 64         | NO    | 4.8       | 0.5 | 4.2  | 0.2 | 4.5  | 0.6   |
| 64         | P     | 4.5       | 1.4 | 4.5  | 0.1 | 4.5  | 0.0   |
| 65         | P     | 4.8       | 0.5 | 4.7  | 0.1 | 4.8  | 0.1   |
| 67         | P     | 4.8       | 0.4 | 5.6  | 0.3 | 5.2  | -0.8  |
